# Supplementary material
Source: PubMed Central journal article supplement (PMC7526861)
Supplement: NIHMS1627562-supplement-Supplemental_Tables_S1-S2.pdf [file NIHMS1627562-supplement-Supplemental_Tables_S1-S2.pdf]

**Supplemental Table S1. Association for venous thromboembolism type based on statin, aspirin use.**

| Statin | Aspirin | No VTE        | DVT alone | PE*       | <i>P</i> -value <sup>†</sup> |
|--------|---------|---------------|-----------|-----------|------------------------------|
|        |         | 1,888 (94.0%) | 72 (3.6%) | 48 (2.4%) | 0.06                         |
|        | +       | 124 (97.6%)   | 1 (0.8%)  | 2 (1.6%)  |                              |
| +      |         | 292 (97.3%)   | 5 (1.7%)  | 3 (1.0%)  |                              |
| +      | +       | 91 (98.9%)    | 1 (1.1%)  | 0         |                              |

Percentages are per column. \*PE without or without DVT. †Chi-square test for *P*trend-value. Abbreviations: HR, hazard ratio; CI, confidence interval; Aspirin, low-dose aspirin; VTE, venous thromboembolism; DVT, deep venous thromboembolism; and PE, pulmonary embolism.

**Supplemental Table S2. Adjustment models for association of statin, aspirin use and venous thromboembolism risk.**

| Adjustment model                                                                          | HR (95%CI)        | <i>P</i> -value |
|-------------------------------------------------------------------------------------------|-------------------|-----------------|
| <b>Demographics alone</b>                                                                 |                   |                 |
| Statin                                                                                    |                   |                 |
| No                                                                                        | 1                 |                 |
| Yes                                                                                       | 0.41 (0.21-0.82)  | <b>0.011</b>    |
| ASA                                                                                       |                   |                 |
| No                                                                                        | 1                 |                 |
| Yes                                                                                       | 0.28 (0.10-0.79)  | <b>0.014</b>    |
| <b>Demographics and comorbidity</b>                                                       |                   |                 |
| Statin                                                                                    |                   |                 |
| No                                                                                        | 1                 |                 |
| Yes                                                                                       | 0.35 (0.16-0.78)  | <b>0.010</b>    |
| ASA                                                                                       |                   |                 |
| No                                                                                        | 1                 |                 |
| Yes                                                                                       | 0.31 (0.11-0.87)  | <b>0.025</b>    |
| <b>Demographics, comorbidity, and tumor factors</b>                                       |                   |                 |
| Statin                                                                                    |                   |                 |
| No                                                                                        | 1                 |                 |
| Yes                                                                                       | 0.36 (0.16-0.79)  | <b>0.011</b>    |
| ASA                                                                                       |                   |                 |
| No                                                                                        | 1                 |                 |
| Yes                                                                                       | 0.40 (0.14-1.12)  | 0.081           |
| <b>Demographics, comorbidity, tumor factors, and treatment type</b>                       |                   |                 |
| Statin                                                                                    |                   |                 |
| No                                                                                        | 1                 |                 |
| Yes                                                                                       | 0.41 (0.19-0.92)  | <b>0.030</b>    |
| ASA                                                                                       |                   |                 |
| No                                                                                        | 1                 |                 |
| Yes                                                                                       | 0.39 (0.14-1.089) | 0.072           |
| <b>Demographics, comorbidity, tumor factors, and treatment type, and survival factors</b> |                   |                 |
| Statin                                                                                    |                   |                 |
| No                                                                                        | 1                 |                 |
| Yes                                                                                       | 0.45 (0.20-0.99)  | <b>0.049</b>    |
| ASA                                                                                       |                   |                 |
| No                                                                                        | 1                 |                 |
| Yes                                                                                       | 0.51 (0.18-1.43)  | 0.20            |

Cox proportional hazard regression models for *P*-values. Significant *P*-values are emboldened. Demographics included age (every quartile), country (USA versus Japan), and obesity (<30.0, 30-34.9, 35.0-39.9, and ≥40.0). Comorbidities included hypertension (yes versus no), diabetes mellitus (yes versus no), and hypercholesterolemia (yes versus no). Tumor factors included histology (type I versus type II), cancer stage (I-II versus III-IV), and CA-125 (<35 versus ≥35 IU/L). Treatment factors included hysterectomy (none, minimally-invasive, and laparotomy).
